# Supplementary material for: Quantitative imaging of volcanic SO 2 plumes with Fabry Pérot Interferometer Correlation Spectroscopy
Source: Copernicus journal article supplement (doi:10.5194/amt-2020-263), 2020-07-21

### Flip-book

1. Cut images 1-49 at frames
2. Sort and stack images 1-49 (1 at top, 49 bottom)
3. Align the edges precisely
4. Stamp holes and tie with cord or staple
5. Flip pages with thumb

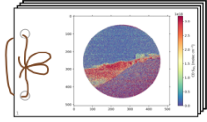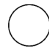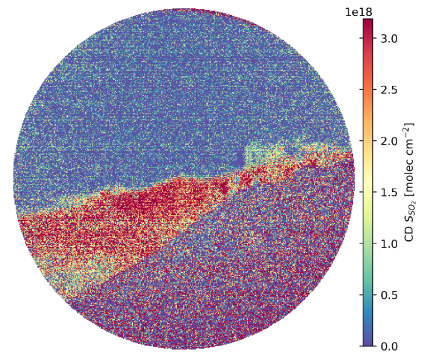

1

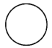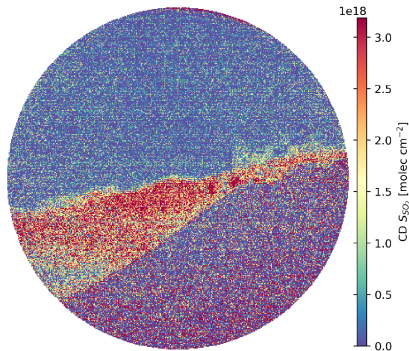

2

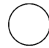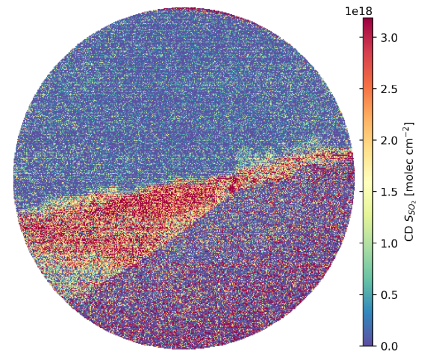

3

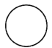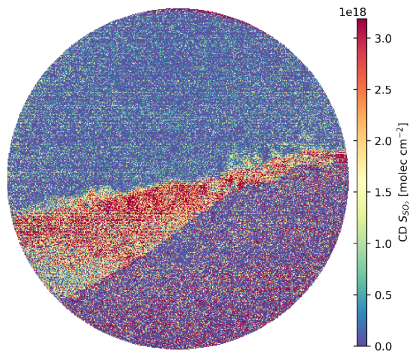

4

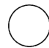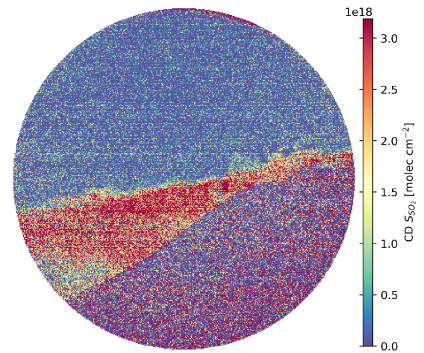

5

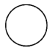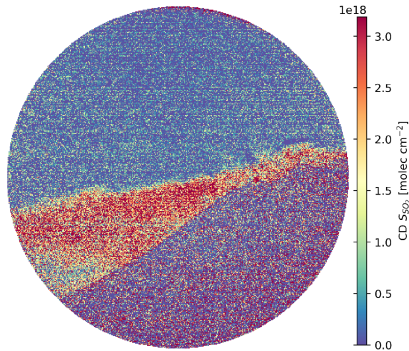

6

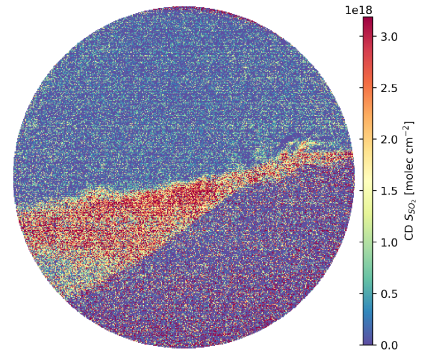

7

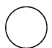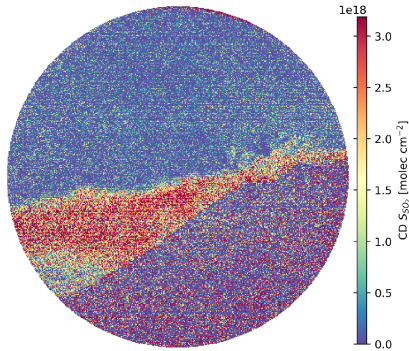

8

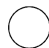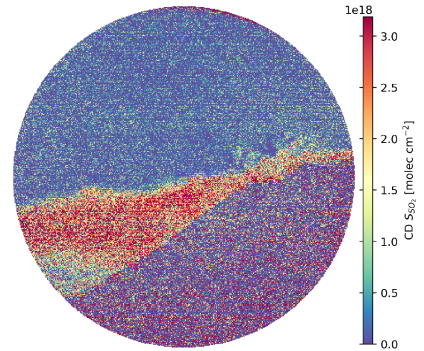

9

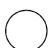



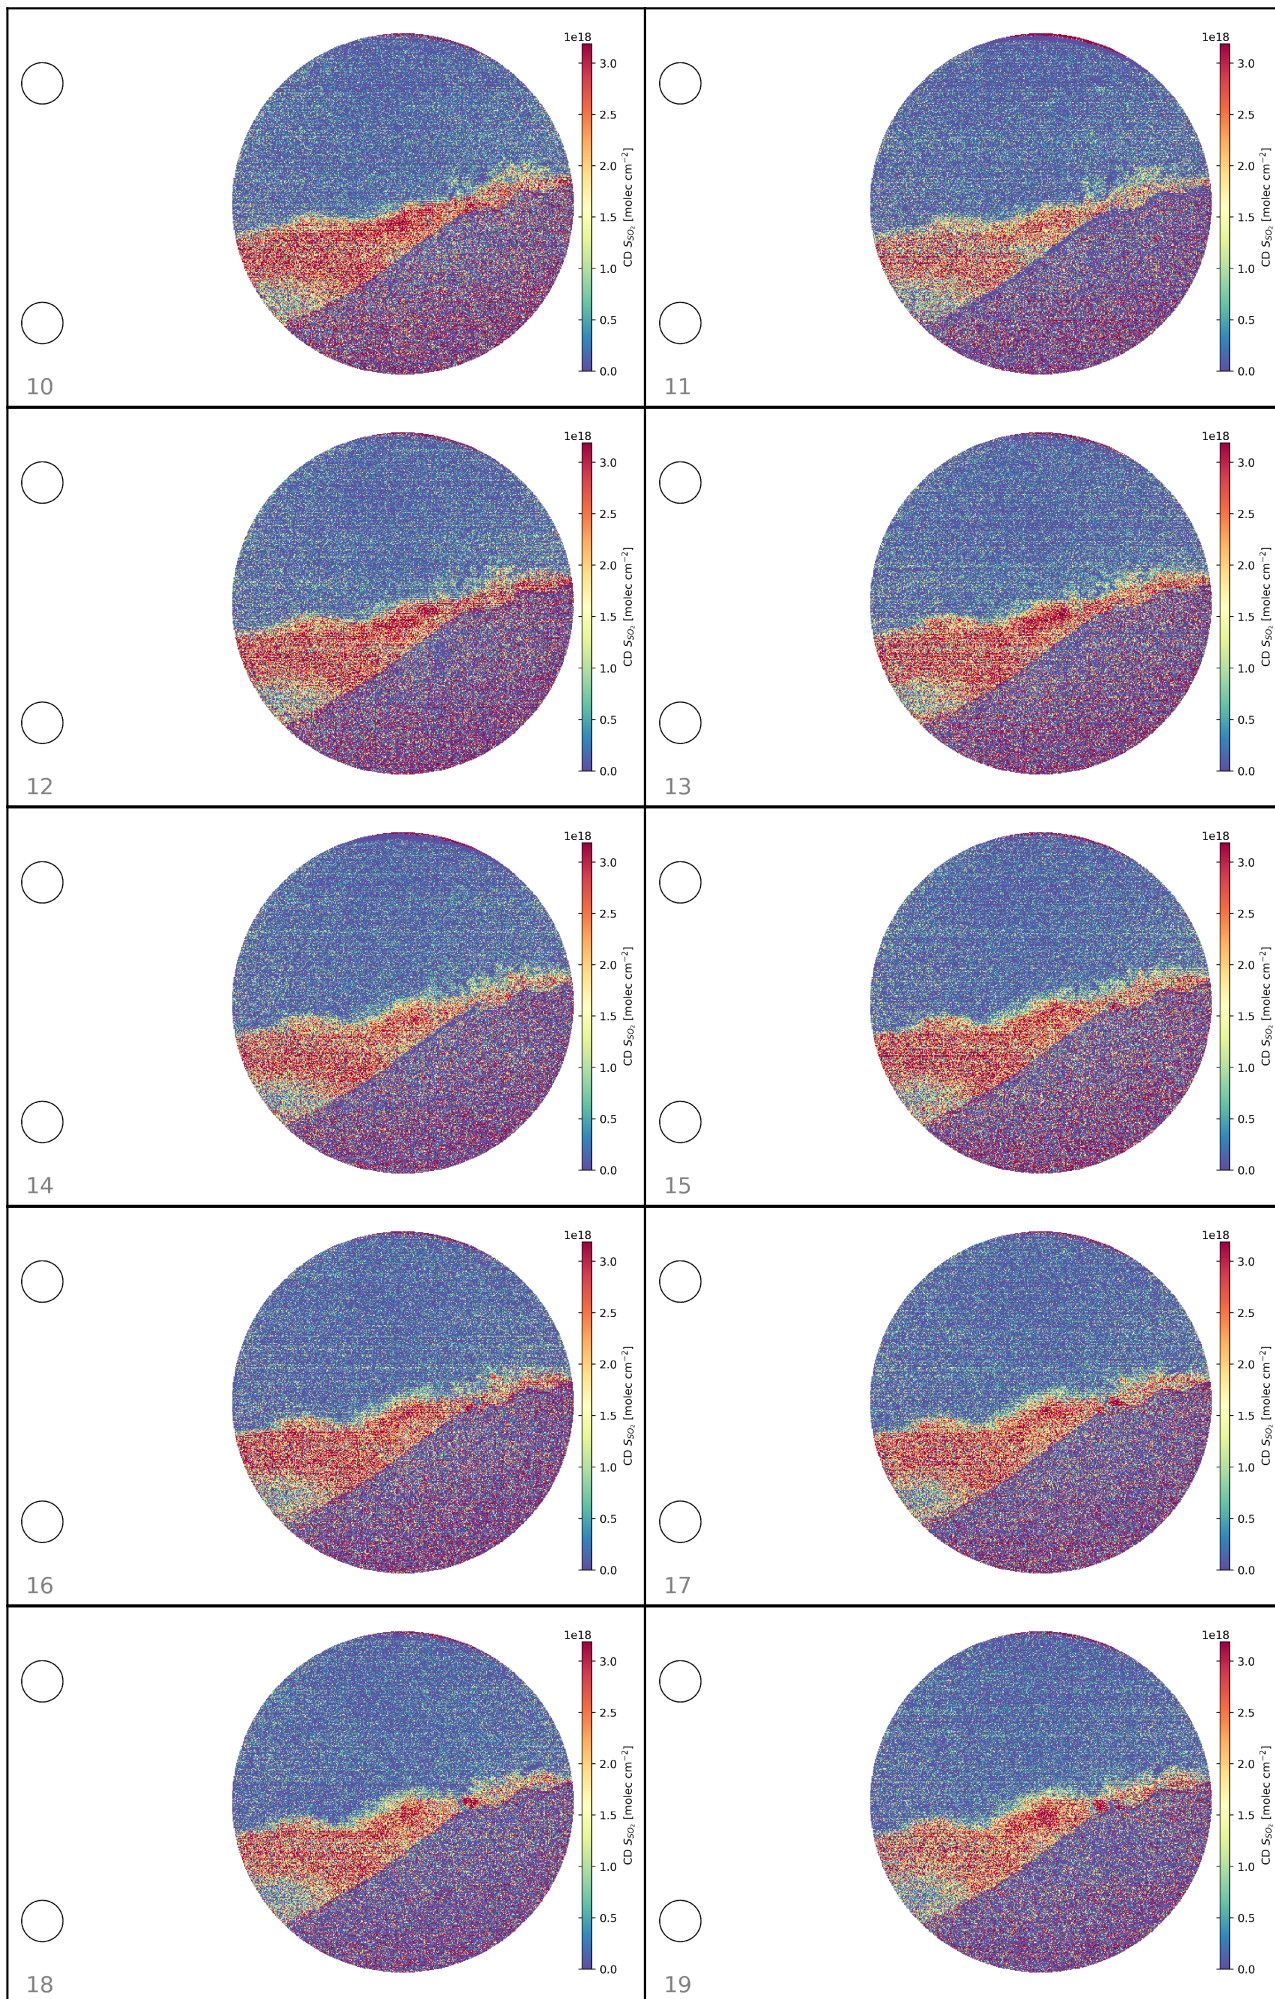



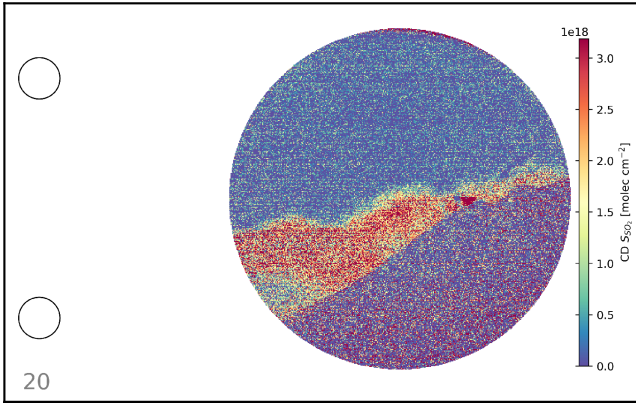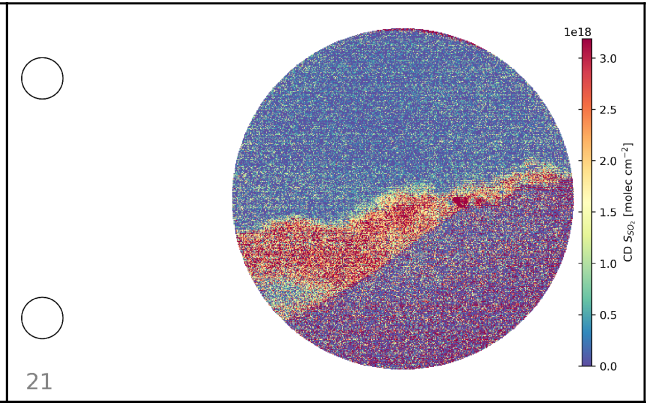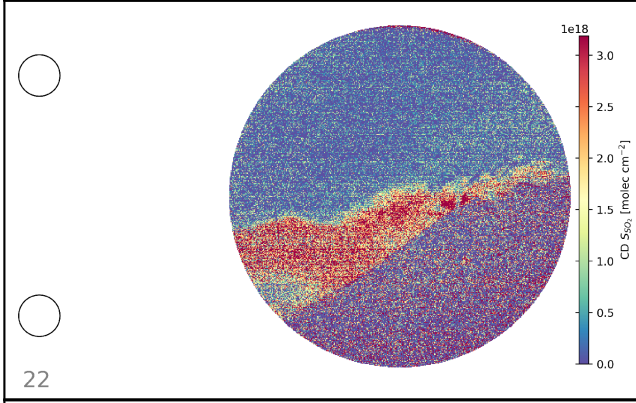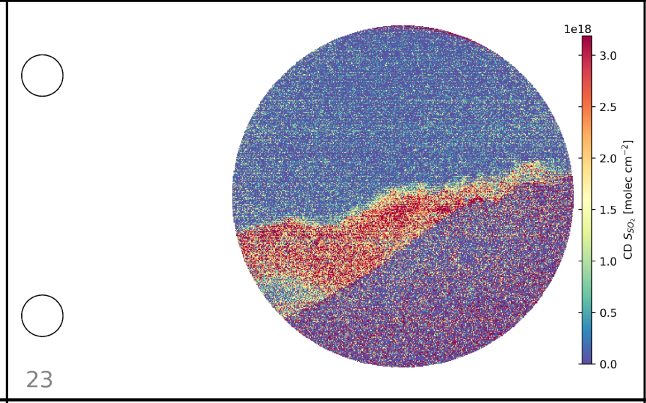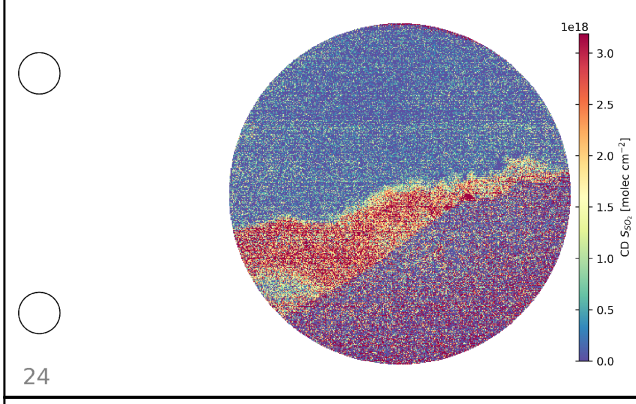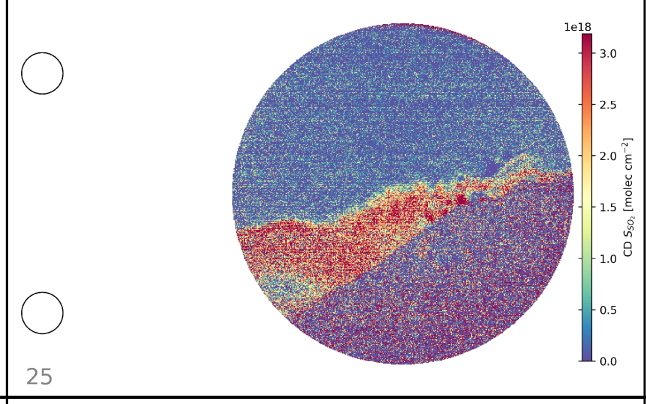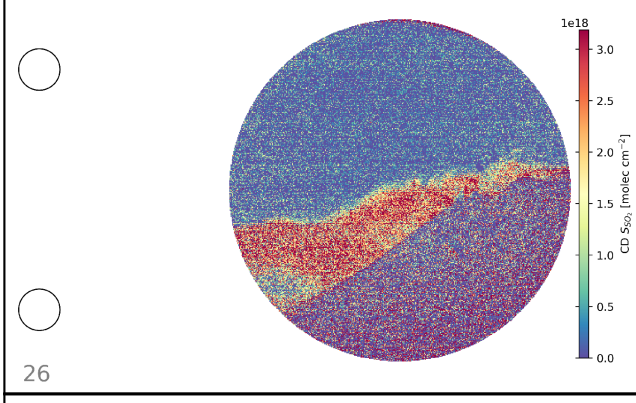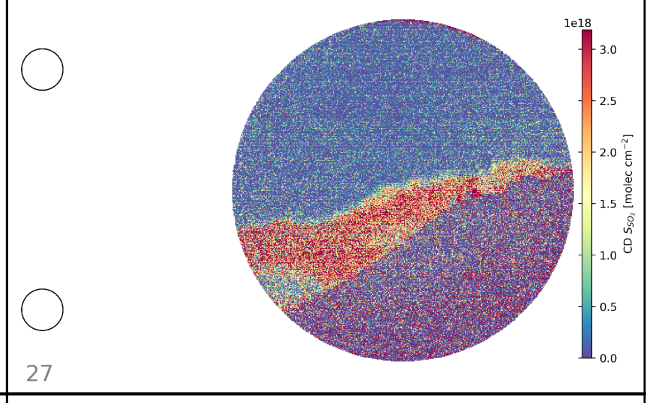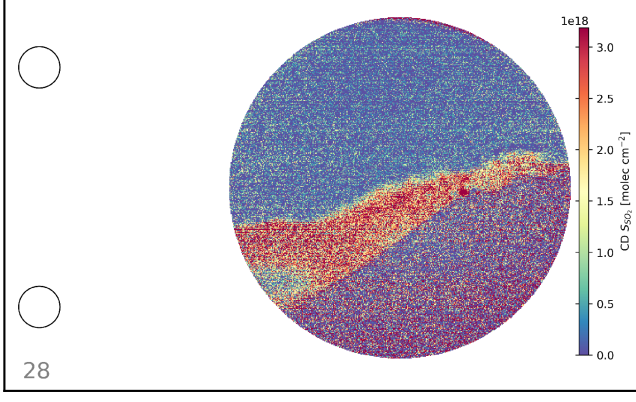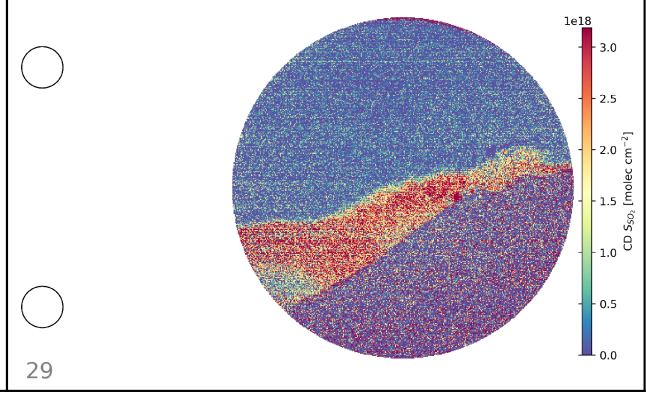



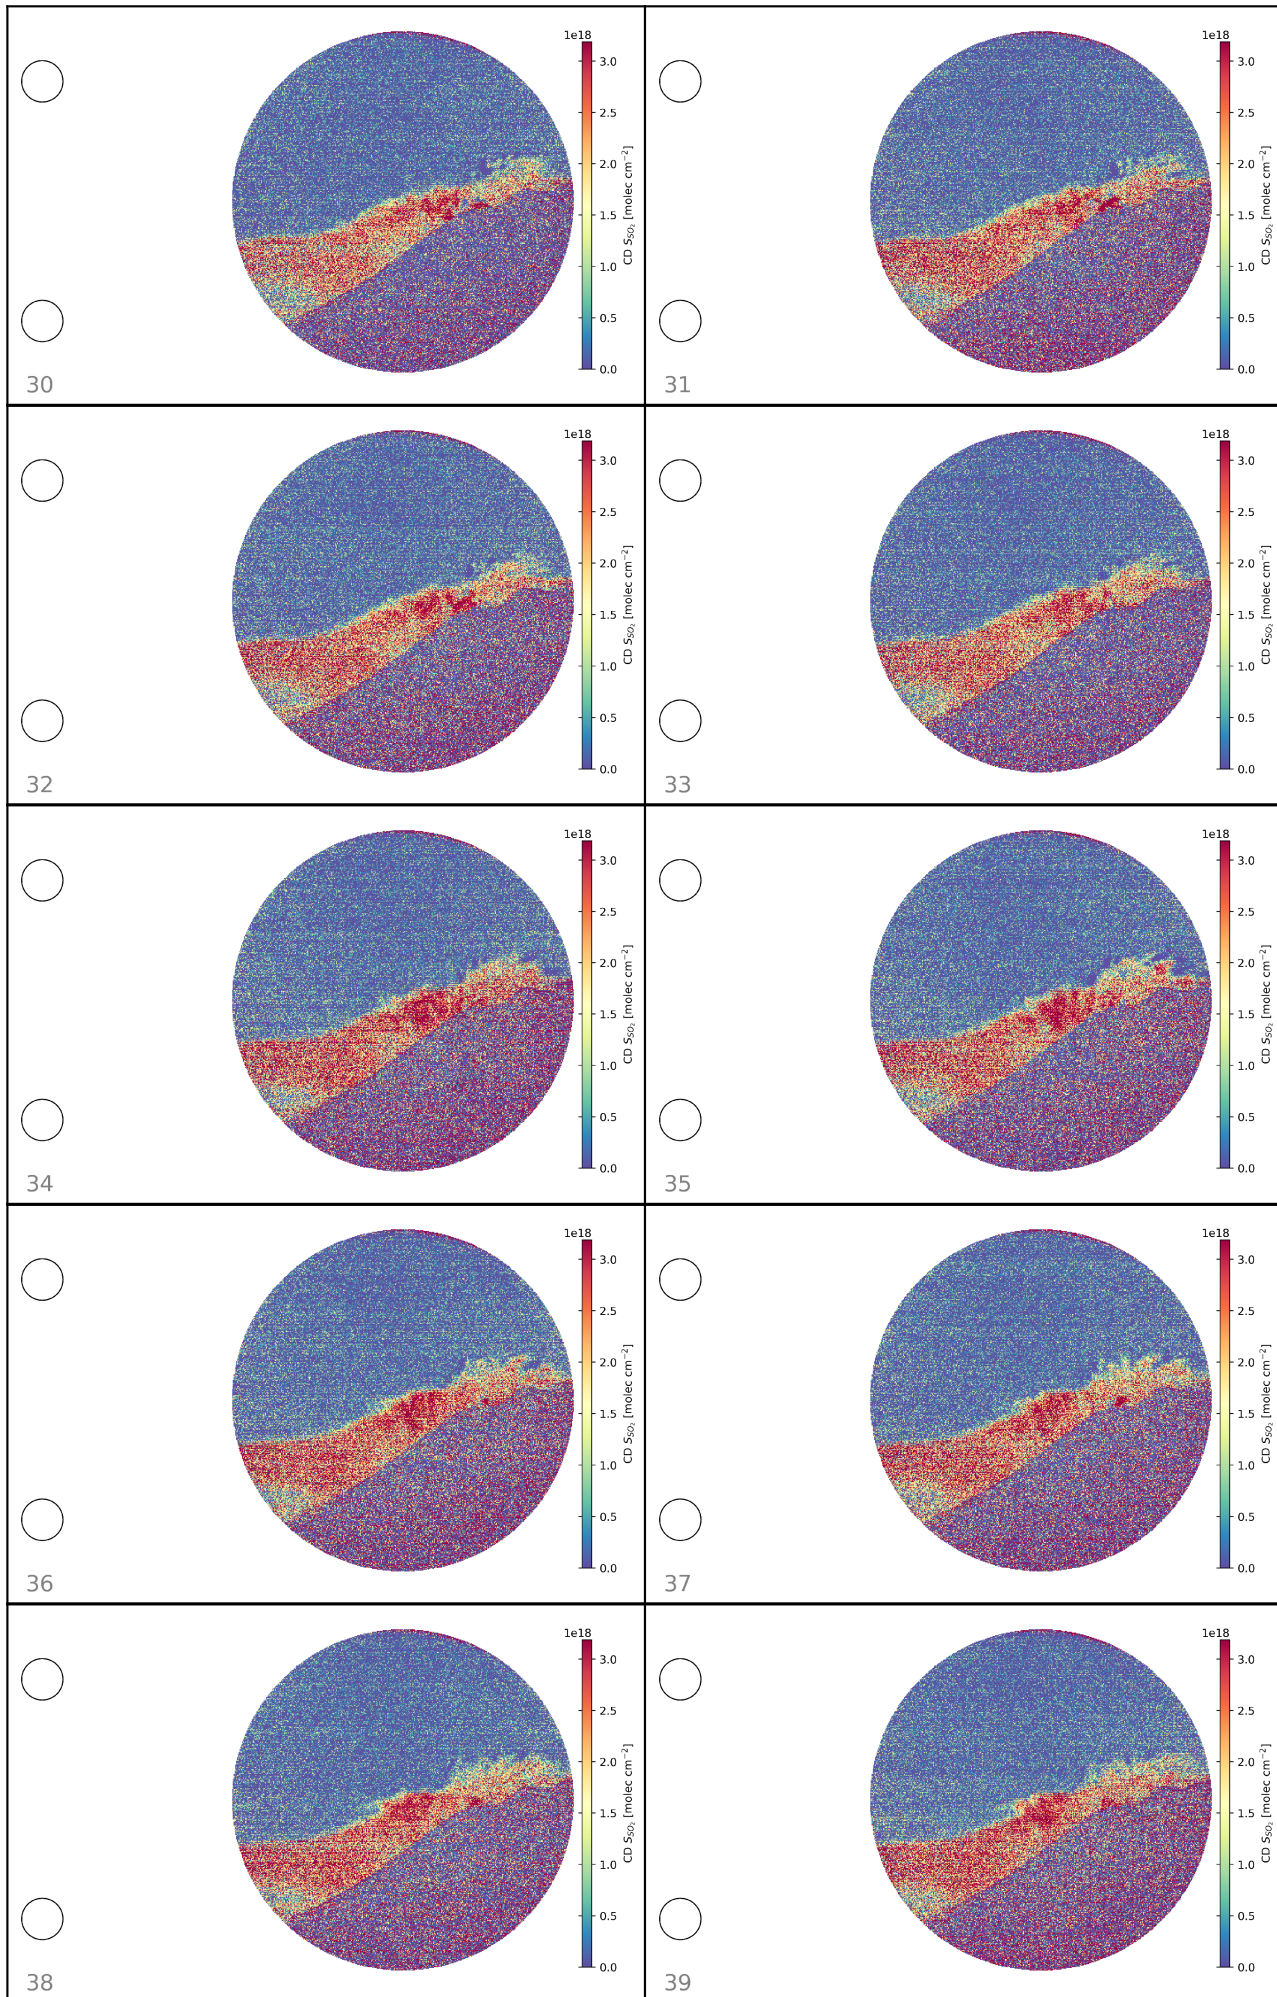



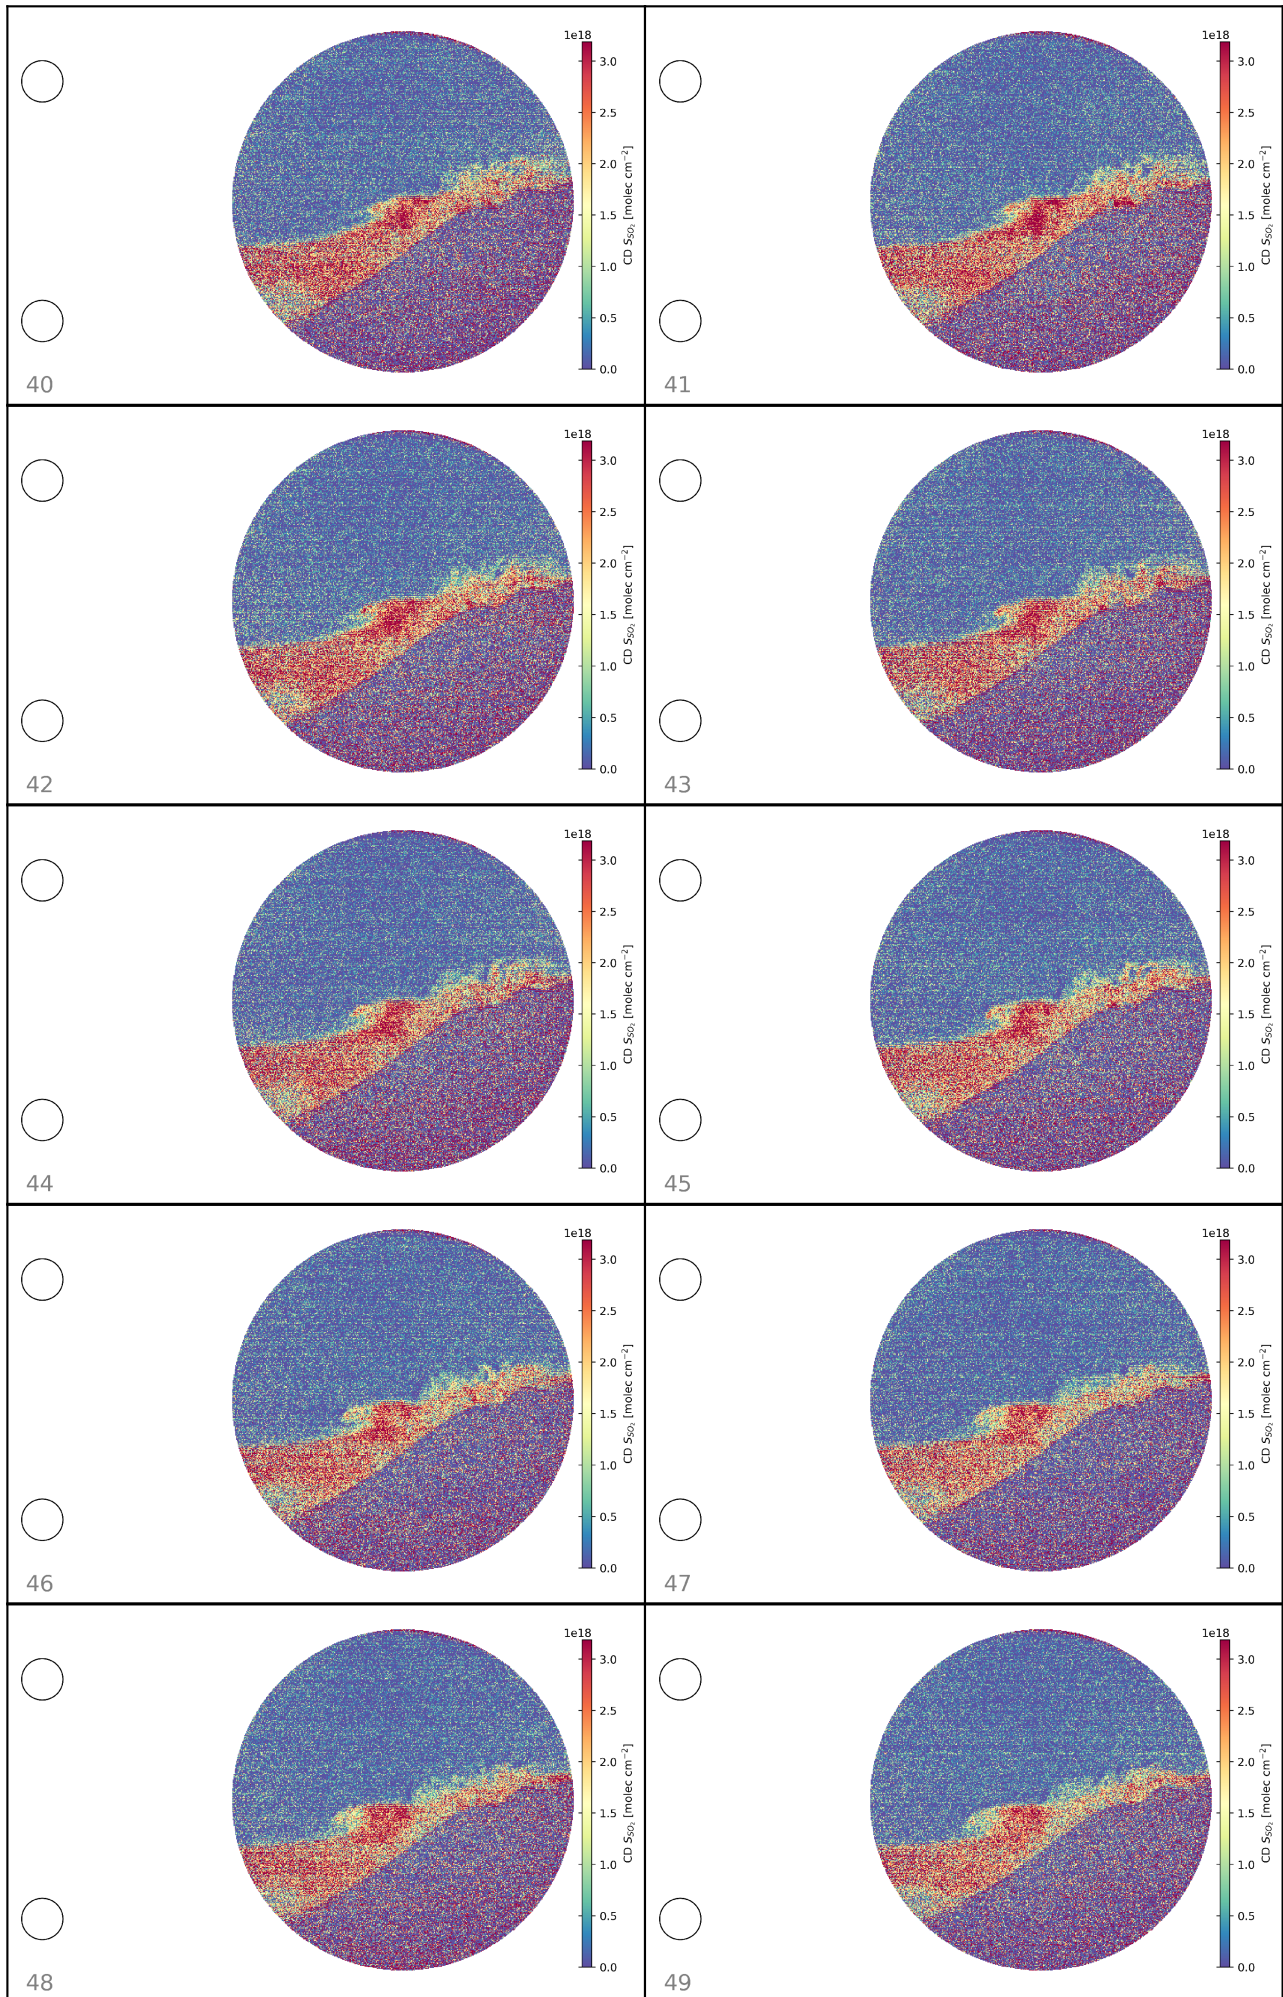

Supplement: Supplementary file 1 [file amt-2020-263-supplement.pdf]
